# Supplementary material for: Observing the real time formation of phosphine-ligated gold clusters by electrospray ionization mass spectrometry
Source: Royal Society of Chemistry journal article supplement (doi:10.1039/c7cp01402c), 2017-01-01
Supplement: c7cp01402c1.pdf [file c7cp01402c1.pdf]

## Observing the Real Time Formation of Phosphine-Ligated Gold Clusters by Electrospray Ionization Mass Spectrometry

**Marshall R. Ligare, Grant E. Johnson,\* and Julia Laskin\***

Physical Sciences Division, Pacific Northwest National Laboratory, P.O. Box 999, MSIN K8-88, Richland, WA 99352

\*Email: [Grant.Johnson@pnnl.gov](mailto:Grant.Johnson@pnnl.gov), [Julia.Laskin@pnnl.gov](mailto:Julia.Laskin@pnnl.gov)

### Supplemental Information

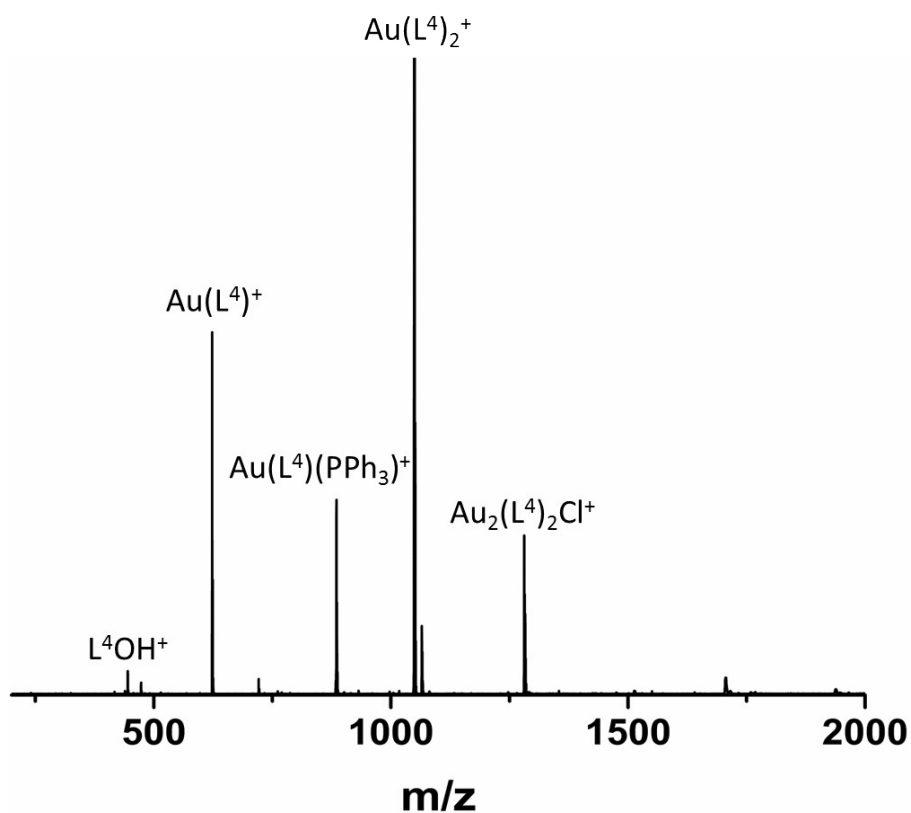

**Figure S1:** Mass spectrum of gold complexes prior to reduction using a ligand ratio of 2:1  $[\text{L}^4]/[\text{PPh}_3]$ .

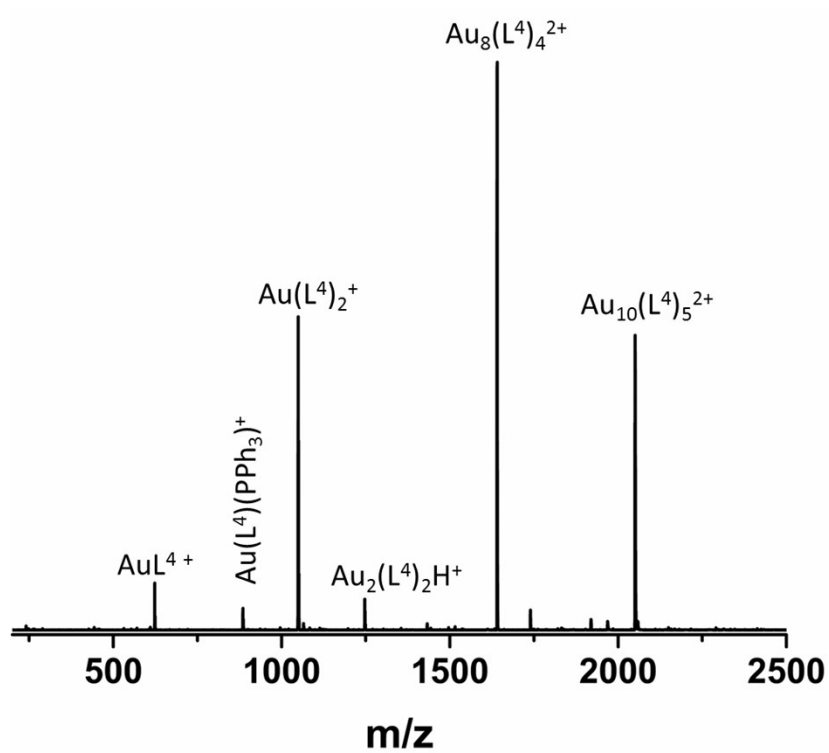

**Figure S2:** Mass spectrum showing products after 24 hours under non-oxidative conditions and 50:1 molar ratio of BTBA to  $\text{Au}(\text{PPh}_3)\text{Cl}$

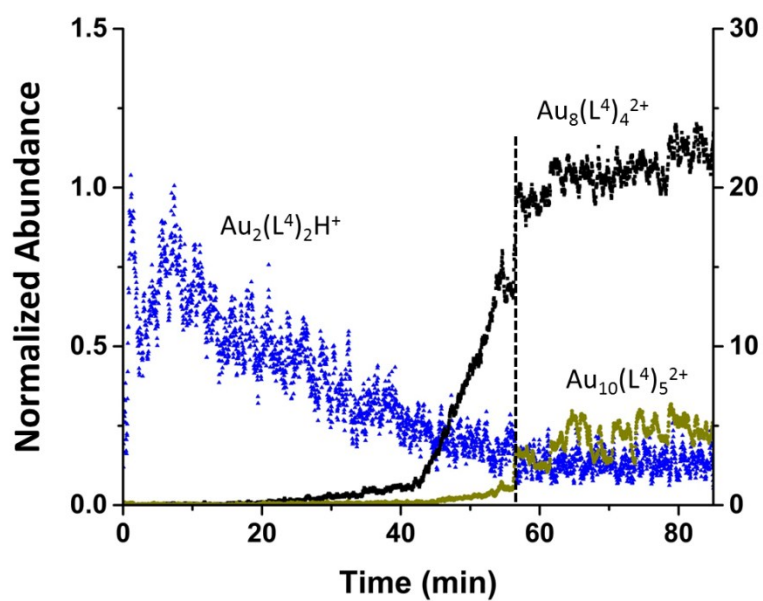

**Figure S3:** Selected ion chromatograms for; **Left Axis;**  $\text{Au}_2(\text{L}^4)_2\text{H}^+$  (blue triangles), **Right Axis;**  $\text{Au}_8(\text{L}^4)_4^{2+}$  (black squares) and  $\text{Au}_{10}(\text{L}^4)_5^{2+}$  (dark yellow circles)

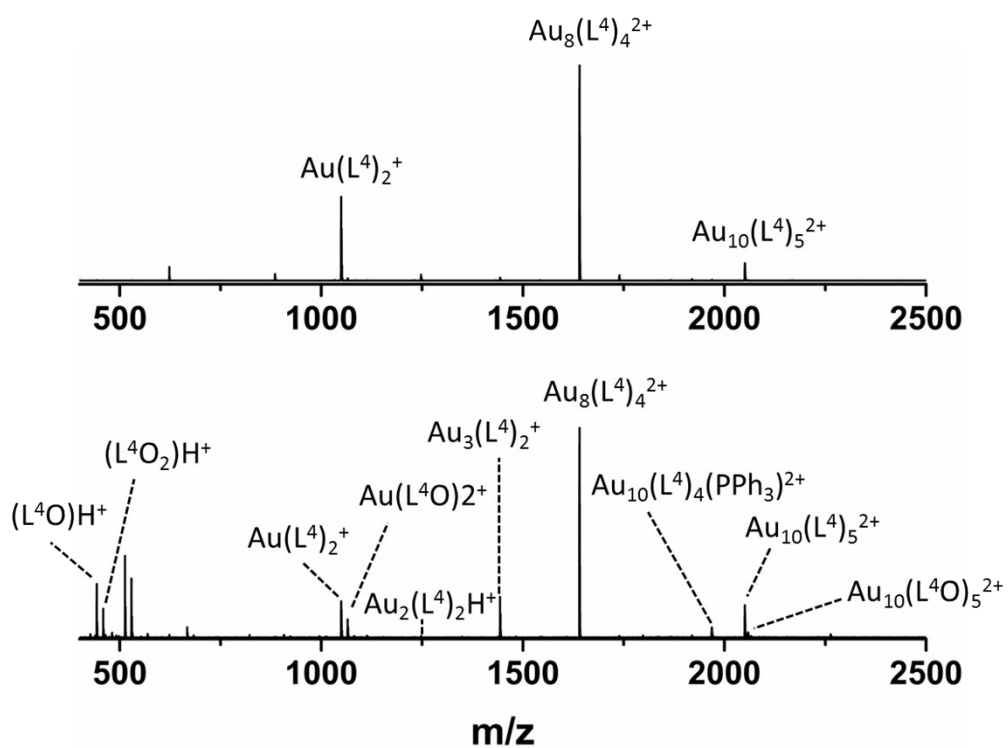

**Figure S4: Top;** Representative mass spectrum 30 minutes after the addition of air to preformed clusters. **Bottom;** Mass spectrum of same reaction mixture after 10 days

| m/z        | Relative Intensity | Calculated m/z | $\Delta$ Mass error | Au | L <sub>4</sub> | PPH <sub>3</sub> | H | O | Cl | Na | Charge |
|------------|--------------------|----------------|---------------------|----|----------------|------------------|---|---|----|----|--------|
| 443.16759  | 18.47              | 443.1692758    | 0.001686            |    | 1              |                  | 1 | 1 |    |    | 1      |
| 459.16238  | 100                | 459.1641908    | 0.001811            |    | 1              |                  | 1 | 2 |    |    | 1      |
| 465.14929  | 5.02               | 465.1512458    | 0.001956            |    | 1              |                  |   | 1 |    | 1  | 1      |
| 481.14436  | 31.78              | 481.1461608    | 0.001801            |    | 1              |                  |   | 2 |    | 1  | 1      |
| 623.13143  | 1.24               | 623.1331208    | 0.001691            | 1  | 1              |                  |   |   |    |    | 1      |
| 721.14701  | 1.05               | 721.14877      | 0.00176             | 1  |                | 2                |   |   |    |    | 1      |
| 821.10547  | 1.52               | 821.1074808    | 0.002011            | 2  | 1              |                  | 1 |   |    |    | 1      |
| 901.21718  | 0.43               | 901.2191678    | 0.001988            | 1  | 1              | 1                |   | 1 |    |    | 1      |
| 907.31071  | 1.42               | 907.3127756    | 0.002066            |    | 2              |                  |   | 2 |    | 1  | 1      |
| 919.12126  | 0.05               | 919.12313      | 0.00187             | 2  |                | 2                | 1 |   |    |    | 1      |
| 923.30588  | 0.94               | 923.3076906    | 0.001811            |    | 2              |                  |   | 3 |    | 1  | 1      |
| 939.30026  | 6.31               | 939.3026056    | 0.002346            |    | 2              |                  |   | 4 |    | 1  | 1      |
| 955.29586  | 0.18               | 955.2975206    | 0.001661            |    | 2              |                  |   | 5 |    | 1  | 1      |
| 1017.06403 | 0.23               | 1017.066241    | 0.002211            | 3  | 1              |                  |   |   |    |    | 1      |
| 1019.07967 | 1.39               | 1019.081841    | 0.002171            | 3  | 1              |                  | 2 |   |    |    | 1      |
| 1065.29229 | 0.12               | 1065.294651    | 0.002361            | 1  | 2              |                  |   | 1 |    |    | 1      |
| 1081.28716 | 0.93               | 1081.289566    | 0.002406            | 1  | 2              |                  |   | 2 |    |    | 1      |
| 1099.19125 | 0.09               | 1099.193528    | 0.002278            | 2  | 1              | 1                | 1 | 1 |    |    | 1      |
| 1230.1468  | 0.43               | 1230.149548    | 0.002748            | 6  | 3              |                  |   |   |    |    | 2      |
| 1247.26998 | <0.05              | 1247.274096    | 0.00412             | 2  | 2              |                  | 1 |   |    |    | 1      |
| 1263.26605 | 0.2                | 1263.269011    | 0.002961            | 2  | 2              |                  | 1 | 1 |    |    | 1      |
| 1279.15434 | 0.61               | 1279.157373    | 0.003033            | 3  | 1              | 1                |   |   |    |    | 1      |
| 1329.13357 | 0.44               | 1329.136728    | 0.003158            | 7  | 3              |                  | 1 |   |    |    | 2      |
| 1427.11271 | 1.78               | 1427.116108    | 0.003398            | 8  | 3              |                  |   |   |    |    | 2      |
| 1435.10934 | 0.05               | 1435.113566    | 0.004226            | 8  | 3              |                  |   | 1 |    |    | 2      |
| 1443.22954 | 0.72               | 1443.232856    | 0.003316            | 3  | 2              |                  |   |   |    |    | 1      |
| 1459.22445 | 1                  | 1459.227771    | 0.003321            | 3  | 2              |                  |   | 1 |    |    | 1      |
| 1476.12026 | 0.21               | 1476.123933    | 0.003673            | 8  | 2              | 2                |   |   |    |    | 2      |
| 1477.12685 | 0.3                | 1477.131733    | 0.004883            | 4  | 1              | 1                | 1 |   |    |    | 1      |
| 1558.15777 | 2.11               | 1558.161674    | 0.003904            | 8  | 3              | 1                |   |   |    |    | 2      |
| 1566.15498 | 0.39               | 1566.159132    | 0.004152            | 8  | 3              | 1                |   | 1 |    |    | 2      |
| 1607.16542 | 0.12               | 1607.169499    | 0.004079            | 8  | 2              | 3                |   |   |    |    | 2      |
| 1640.19523 | 0.97               | 1640.199416    | 0.004186            | 8  | 4              |                  |   |   |    |    | 2      |
| 1641.20185 | 3.17               | 1641.207216    | 0.005366            | 4  | 2              |                  | 1 |   |    |    | 1      |
| 1648.19255 | 2.28               | 1648.196873    | 0.004323            | 8  | 4              |                  |   | 1 |    |    | 2      |
| 1656.1899  | 0.22               | 1656.194331    | 0.004431            | 8  | 4              |                  |   | 2 |    |    | 2      |
| 1657.19561 | 0.31               | 1657.202131    | 0.006521            | 4  | 2              |                  | 1 | 1 |    |    | 1      |
| 1697.2002  | 0.25               | 1697.204698    | 0.004498            | 8  | 3              | 2                |   | 1 |    |    | 2      |
| 1755.12354 | 0.06               | 1755.128234    | 0.004694            | 10 | 3              | 1                |   |   |    |    | 2      |
| 1787.23517 | 0.13               | 1787.239897    | 0.004727            | 8  | 4              | 1                |   | 2 |    |    | 2      |
| 1804.13096 | 0.26               | 1804.136059    | 0.005099            | 10 | 2              | 3                |   |   |    |    | 2      |
| 1837.16065 | 2.83               | 1837.165976    | 0.005326            | 10 | 4              |                  |   |   |    |    | 2      |
| 1845.15754 | 0.09               | 1845.163433    | 0.005893            | 10 | 4              |                  |   | 1 |    |    | 2      |
| 1853.1378  | 0.21               | 1853.143883    | 0.006083            | 10 | 1              | 5                |   |   |    |    | 2      |
| 1877.26958 | 0.14               | 1877.275096    | 0.005516            | 8  | 5              |                  |   | 3 |    |    | 2      |
| 1886.16808 | 0.14               | 1886.1738      | 0.00572             | 10 | 3              | 2                |   |   |    |    | 2      |
| 1894.16504 | 0.19               | 1894.171258    | 0.006218            | 10 | 3              | 2                |   | 1 |    |    | 2      |
| 1935.17533 | 0.29               | 1935.181625    | 0.006295            | 10 | 2              | 4                |   |   |    |    | 2      |
| 1943.17269 | 0.21               | 1943.179082    | 0.006392            | 10 | 2              | 4                |   | 1 |    |    | 2      |
| 1976.20259 | 0.22               | 1976.208999    | 0.006409            | 10 | 4              | 1                |   | 1 |    |    | 2      |
| 1984.18745 | 0.09               | 1984.189449    | 0.001999            | 10 | 1              | 6                |   |   |    |    | 2      |
| 2025.21017 | 0.16               | 2025.216824    | 0.006654            | 10 | 3              | 3                |   | 1 |    |    | 2      |
| 2033.20715 | 0.08               | 2033.214281    | 0.007131            | 10 | 3              | 3                |   | 2 |    |    | 2      |
| 2034.12654 | 0.05               | 2034.132536    | 0.005996            | 12 | 4              |                  |   |   |    |    | 2      |
| 2050.24228 | 0.18               | 2050.249283    | 0.007003            | 10 | 5              |                  |   |   |    |    | 2      |
| 2058.2395  | 0.25               | 2058.246741    | 0.007241            | 10 | 5              |                  |   | 1 |    |    | 2      |
| 2066.23701 | 0.12               | 2066.244198    | 0.007188            | 10 | 5              |                  |   | 2 |    |    | 2      |
| 2115.24398 | 0.09               | 2115.252023    | 0.008043            | 10 | 4              | 2                |   | 2 |    |    | 2      |
| 2157.22557 | 0.26               | 2157.233921    | 0.00835             | 11 | 5              |                  | 1 | 1 |    |    | 2      |
| 2165.21865 | <0.05              | 2165.231378    | 0.012728            | 11 | 5              |                  | 1 | 2 |    |    | 2      |
| 2174.20698 | 0.06               | 2174.214447    | 0.007467            | 11 | 5              |                  |   | 1 | 1  |    | 2      |

**Table S1:** Experimental and calculated mass to charge ratios of gold clusters formed in uncontrolled oxidative conditions
